# Supplementary material
Source: publisher figshare collection journal article supplement (https://tandf.figshare.com/articles/dataset/_/12219548)
Supplement: Supplementary file 2 [file 1]

**S3. Data for the best solution found for the 759-bar problem in Variant I**  
**(Weight=27,967 kg)**

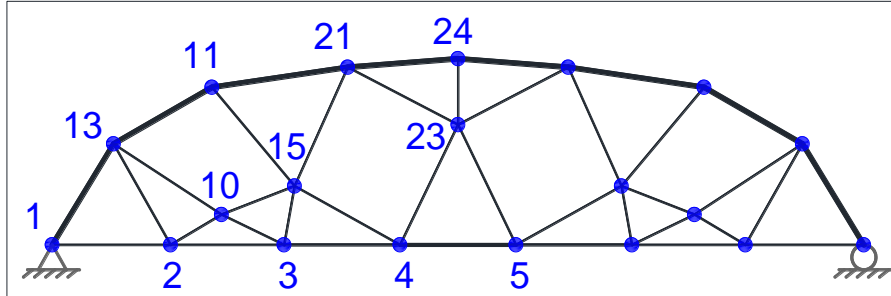

| Parameter  | Value    | Parameter   | Value | Parameter   | Value |
|------------|----------|-------------|-------|-------------|-------|
| $x_{10}$   | -20.3633 | $A_{1-2}$   | 10    | $A_{10-15}$ | 6.49  |
| $y_{10}$   | 2.5562   | $A_{2-3}$   | 10    | $A_{11-13}$ | 32    |
| $x_{11}$   | -21.0379 | $A_{3-4}$   | 14.1  | $A_{11-15}$ | 8.85  |
| $y_{11}$   | 13.0219  | $A_{4-5}$   | 20    | $A_{11-21}$ | 42.7  |
| $x_{13}$   | -29.6019 | $A_{1-13}$  | 35.3  | $A_{15-21}$ | 8.85  |
| $y_{13}$   | 8.4274   | $A_{2-10}$  | 6.49  | $A_{21-23}$ | 8.85  |
| $x_{15}$   | -14.0427 | $A_{2-13}$  | 8.85  | $A_{21-24}$ | 35.30 |
| $y_{15}$   | 4.9075   | $A_{3-10}$  | 6.49  | $A_{23-24}$ | 6.49  |
| $x_{21}$   | -9.5590  | $A_{3-15}$  | 6.49  |             |       |
| $y_{21}$   | 14.6720  | $A_{4-15}$  | 8.85  |             |       |
| $y_{23}^*$ | 9.9145   | $A_{4-23}$  | 8.85  |             |       |
| $y_{24}^*$ | 15.3462  | $A_{10-13}$ | 8.85  |             |       |

Max. Stress Ratio = 1.000

Max. Slenderness Ratio= 0.978

Max. Displacement Ratio= 0.973

\* Node in group 3 (on the symmetry line)
